# Supplementary material for: Regioselective insertion of 2-vinylpyridine in niobium and tantalum aryloxide complexes: an alternate route to pyridylalkyl metallacycles
Source: Royal Society of Chemistry journal article supplement (doi:10.1039/b416536e), 2005-01-01
Supplement: b416536e.doc [file b416536e.doc]

**Supporting Information**

**Regioselective insertion of 2-vinylpyridine in niobium and tantalum aryloxide complexes: an alternate route to pyridylalkyl metallacycles**

**Rex A. Corbin*, Brandon E. Dusick, Khamphee Phomphrai,**

**Phillip E. Fanwick and Ian P. Rothwell**

**Department of Chemistry, Purdue University, 560 Oval Drive,**

**West Lafayette, Indiana, USA 47907.**

**Fax: 1 (765) 494-0239; Tel: 1 (765) 496-3491**

**E-mail: rcorbin@purdue.edu**

**Experimental Section**

**General Details**

All reactions were carried out under an inert atmosphere (N2) at room temperature utilizing a vacuum atmosphere Dri-Lab glove box and standard schlenk techniques. Elemental Microanalysis and X-ray Crystal Diffraction services were performed in-house at Purdue University facilities. The 1H NMR spectra were obtained with a Varian INOVA 300 MHz instrument referenced to internal protio impurities of commercially available D6-benzene. Reagents were purchased from the Sigma-Aldrich company and or Strem Chemical Company and used as received. Benzene, hexane, and pentane were distilled from sodium benzophenone and stored over sodium ribbons under a nitrogen atmosphere prior to use. [Ta(OC6H3Pri2-2,6)2Cl3],1 [Ta(OC6H2Pri2-2,6-Br-4)2Cl3],2 [Ta(OC6H3Ph2-2,6)2Cl3],3 and [Nb(OC6H3Pri2-2,6)3Cl2]4 were prepared previously.

**Synthesis of [Ta(OC6H3Pri2-2,6)2 (η2-C,N-C7H8N)2Cl] (2a) –** 2.00g (3.10mmol) of [Ta(OC6H3Pri2-2,6)2Cl3]1 was suspended into a 5mL hexane/benzene (1:1 volume equivalency) solvent system. To the resulting bright yellow suspension, 0.67mL (6.23mmol, 0.655g) of 2-vinylpyridine was added immediately followed with 1.26mL of (4.68mmol, 1.36g) tri-n-butyltin hydride with magnetic stirring. The resulting red/brown reaction mixture was left to stand for 15 h resulting in product precipitation. The reaction solvent was decanted and the precipitate was washed with hexane and dried under vacuum yielding 1.10g (46.4%) of yellow powder. Compound **2a** was heated in a minimal amount of benzene and X-ray quality crystals were obtained upon cooling to room temperature. Anal. Calcd. for C38H50ClN2O2Ta: C, 58.3; H, 6.44; N, 3.58; Cl, 4.53. Found: C, 58.33; H, 6.40; N, 3.47; Cl, 4.76. 1H (C6D6): δ 9.09 (d, 2H, α py-H); δ 7.04-7.02 (m, O-Ph-H aromatics); δ 6.94 (m, 2H, β py-H); δ 6.91 (m, 2H, δ py-H); δ 6.33 (t, 2H, γ py-H); δ 2.87 (sep., 4H, Pri-CH); δ 2.39 (d, 6H, Ta-CH(CH3)); δ 2.28 (q, 2H, Ta-(CH)CH3); δ 1.27 (d, 12H, Pri-CH3); δ (d, 12H, Pri-CH3).

**Synthesis of [Ta(OC6H2Pri2-2,6-Br-4)2(η2-C,N-C7H8N)2Cl] (2b) –** 2.00g (2.50mmol) of [Ta(OC6H3Pri2-2,6-Br-4)2Cl3]2 was suspended into a 5mL hexane/benzene (1:1 volume equivalency) solvent system. To the resulting tan colored suspension, 0.54mL (5.01mmol) of 2-vinylpyridine was added and immediately followed by the addition of 1.35mL (5.02mmol) of tri-n-butyltin hydride with magnetic stirring. The remaining procedure is identical to that of the preparation of compound I. This reaction yielded 0.28g (11.9%) of yellow powder. Compound **2b** was heated in a minimal amount of benzene and X-ray quality crystals were obtained upon cooling to room temperature. Anal. Calcd. for C38H48Br2ClN2O2Ta: C, 48.5; H, 5.15; N, 2.98. Found: C, 47.10; H, 4.92; N, 3.06. 1H NMR (C6D6): δ 8.97 (d, 2H, α py-H); δ 7.26 (s, 4H, Ph-H); δ 6.97 (t, 2H, β py-H); δ 6.86 (d, 2H, δ py-H); δ 6.39 (t, 2H, γ py-H); δ 2.63 (sep., 4H, Pri-CH); δ 2.33 (d, 6H, Ta-CH-(CH3)); δ 2.15 (q, 2H, Ta-(CH)-CH3); δ 1.09 (d, 12H, Pri-(CH3)2); δ 0.29 (d, 12H, Pri-(CH3)2).

**Synthesis of**  **[Ta(OC6H3Ph2-2,6)2(η2-C,N-C7H8N)Cl2] (2c) –** 2.00g (2.57mmol) of [Ta(OC6H3Ph2-2,6)2Cl3]3 was suspended into a 5mL hexane/benzene (1:1 volume equivalency) solvent system. To the resulting orange suspension, 0.55mL (5.10mmol, 0.536g) of 2-vinylpyridine was added and immediately followed by the addition of 1.38mL (5.13mmol, 1.49g) of tri-n-butyltin hydride with magnetic stirring. The remaining procedure is identical to that of the preparation of compound I. This reaction yielded 2.08g (95.3%) of tan powder. Compound **2c** was heated in a minimal amount of benzene and X-ray quality crystals were obtained upon cooling to room temperature. Anal. Calcd. for C43H34Cl2NO2Ta: C, 60.9; H, 4.04; Cl, 8.36; N, 1.65. Found: C, 59.86; H, 4.38; Cl, 8.35; N, 1.95. 1H NMR (C6D6): δ 8.35 (d, 1H, α py-H); δ 7.53-7.45 (m, O-Ph-H aromatics); δ 7.32-7.21 (m, Ph-H aromatics); δ 6.98-6.87 (m, Ph-H aromatics); δ 6.60 (t, 1H, γ py-H); δ 6.11 (t. 1H, β py-H); δ 5.90 (d, 1H, δ py-H); δ 1.91 (d, 3H, Ta-CH(CH3)); δ 1.08 (q, 1H, Ta-(CH)CH3).

**Synthesis of [Nb(OC6H3Pri2-2,6)3(η2-C,N-C7H8N)Cl] (4) –** 2.00g (2.87mmol) of [Nb(OC6H3Pri2-2,6)3Cl2]4 was dissolved in 5mL of benzene resulting in a bright red solution. To this solution 0.62mL (5.75mmol, 0.605g) of 2-vinylpyridine was added immediately followed with the addition of 1.55mL (5.75mmol, 1.67g) of tri-n-butyltin hydride with magnetic stirring. The solution was left to stand for 15 h. and then concentrated under vacuum resulting in a residue immersed in a dark red oil. The residue was washed with pentane and vacuumed dried to yield 1.19g (54.0%) consisting of a golden orange powder. X-ray quality crystals were obtained by placing a layer of hexanes over a concentrate solution of compound **4** in benzene. Anal. Calcd. for C43H59ClNNbO3: C, 67.4; H, 7.76; N, 1.83. Found: C, 66.33; H, 7.56; N, 2.03. 1H NMR (C6D6):  8.98 (d, 1H,  py-H);  7.13-6.88 (m, O-Ph-H aromatics);  6.85 (t, 1H,  py-H);  6.54 (d, 1H,  py-H);  6.49 (t, 1H,  py-H);  4.04 (sep., 2H, Pri-CH);  3.95 (sep., 2H, Pri-CH);  3.37 (sep., 2H, Pri-CH);  3.01 (q, 1H, Nb-(CH)CH3);  2.19 (d, 3H, NB-CH(CH3));  1.39-0.95 (m, Pri-CH3).

**References**

1. L. R. Chamberlain, I. P. Rothwell and J. C. Huffman, *Inorg. Chem.*, 1984, **23**, 2575.

2. S. W. Schweiger, E. E. Freeman, J. R. Clark, M. C. Potyen, P. E. Fanwick and I. P. Rothwell, *Inorganica Chimica Acta*, 2000, **307**, 64.

3. R. W. Chesnut, L. D. Durfee, P. E. Fanwick and I. P. Rothwell, *Polyhedron*, 1987, **6**, 2019.

4. J. R. Clark, A. L. Pulvirenti, P. E. Fanwick, M. Sigalas, O. Eisenstein and I. P. Rothwell, *Inorg. Chem.*,1997, **36**, 3623.
